# Supplementary material for: Concentration-dependent mortality of chloroquine in overdose
Source: eLife. 2020 Jul 8;9:e58631. doi: 10.7554/eLife.58631 (PMC7417172; doi:10.7554/eLife.58631)
Supplement: Figure 1—source data 1. [file elife-58631-fig1-data1.xlsx]

## Sheet: Sheet1
Title	Conditions	Interventions	URL	Type	Loading Dose	Maintenance dose	Times per day	Total Duration	Drug	Weight based	Total dose (salt)	Total dose (base)
Hydroxychloroquine Treatment for Severe COVID-19 Pulmonary Infection (HYDRA Trial)	COVID-19|Severe Acute Respiratory Syndrome	Drug: Hydroxychloroquine|Drug: Placebo oral tablet	https://ClinicalTrials.gov/show/NCT04315896	treatment	none	200	2	10	HCQ		4000	3100
The Efficacy of Different Anti-viral Drugs in COVID 19 Infected Patients	SARS-CoV Infection|COVID 19|Acute Respiratory Distress Syndrome ARDS	Drug: Hydroxychloroquine|Drug: Remdesivir|Other: (Standard of Care) SoC	https://ClinicalTrials.gov/show/NCT04321616	treatment	800	400	2	10	HCQ		8800	6820
Treatments for COVID-19: Canadian Arm of the SOLIDARITY Trial	COVID-19	Drug: Lopinavir/ritonavir|Drug: Hydroxychloroquine|Drug: remdesivir	https://ClinicalTrials.gov/show/NCT04330690	treatment	800	400	2	10	HCQ		9600	7440
Use of Bromhexine and Hydroxychloroquine for Treatment of COVID-19 Pneumonia	Covid-19	Drug: Bromhexine Oral Tablet and/or hydroxychloroquine tablet	https://ClinicalTrials.gov/show/NCT04355026	treatment	none	200	2	NA	HCQ
Hydroxychloroquine and Ivermectin for the Treatment of COVID-19 Infection	COVID-19	Drug: Hydroxychloroquine|Drug: Ivermectin|Drug: Placebo	https://ClinicalTrials.gov/show/NCT04391127	treatment	400	200	2	5	HCQ		2400	1860
Hydroxychloroquine vs. Azithromycin for Outpatients in Utah With COVID-19	COVID-19	Drug: Hydroxychloroquine|Drug: Azithromycin	https://ClinicalTrials.gov/show/NCT04334382	treatment	400	200	2	5	HCQ		2400	1860
Clinical Trial of Combined Use of Hydroxychloroquine, Azithromycin, and Tocilizumab for the Treatment of COVID-19	COVID-19	Drug: Tocilizumab|Drug: Hydroxychloroquine|Drug: Azithromycin	https://ClinicalTrials.gov/show/NCT04332094	treatment	400	200	2	7	HCQ		3200	2480
Hydroxychloroquine and Zinc With Either Azithromycin or Doxycycline for Treatment of COVID-19 in Outpatient Setting	COVID-19	Drug: Hydroxychloroquine|Drug: Azithromycin|Drug: Zinc Sulfate|Drug: Doxycycline	https://ClinicalTrials.gov/show/NCT04370782	treatment	400	200	2	5	HCQ		2400	1860
Evaluating the Efficacy of Hydroxychloroquine and Azithromycin to Prevent Hospitalization or Death in Persons With COVID-19	COVID-19|SARS-CoV 2	Drug: Hydroxychloroquine (HCQ)|Drug: Azithromycin (Azithro)|Drug: Placebo for Hydroxychloroquine|Drug: Placebo for Azithromycin	https://ClinicalTrials.gov/show/NCT04358068	treatment	400	200	2	7	HCQ		3200	2480
Outcomes Related to COVID-19 Treated With Hydroxychloroquine Among In-patients With Symptomatic Disease	Coronavirus|Acute Respiratory Infection|SARS-CoV Infection	Drug: Hydroxychloroquine|Drug: Placebo	https://ClinicalTrials.gov/show/NCT04332991	treatment	400	200	2	5	HCQ		2400	1860
Proactive Prophylaxis With Azithromycin and hydroxyChloroquine in Hospitalized Patients With COVID-19	Virus Diseases|Infection Viral|Corona Virus Infection	Drug: Azithromycin|Drug: Hydroxychloroquine|Drug: Placebo oral tablet	https://ClinicalTrials.gov/show/NCT04322396	treatment	NA	NA	NA	NA	HCQ
A Randomized Controlled Clinical Trial: Hydroxychloroquine for the Treatment of COVID-19 in Hospitalized Patients	COVID-19	Drug: Hydroxychloroquine	https://ClinicalTrials.gov/show/NCT04345692	treatment	400	200	2	5	HCQ		2400	1860
Hydroxychloroquine Plus Azithromycin Versus Hydroxychloroquine for COVID-19 Pneumonia (COVIDOC Trial)	Coronavirus Infection|Pneumonia, Viral	Drug: Hydroxychloroquine + placebo|Drug: hydroxychloroquine + azithromycin	https://ClinicalTrials.gov/show/NCT04345861	treatment	800	600	1	5	HCQ		3200	2480
The PATCH Trial (Prevention And Treatment of COVID-19 With Hydroxychloroquine)	COVID-19	Drug: Hydroxychloroquine Sulfate 400 mg twice a day|Drug: Hydroxychloroquine Sulfate 600 mg twice a day|Drug: Hydroxychloroquine Sulfate 600 mg once a day|Drug: Placebo oral tablet	https://ClinicalTrials.gov/show/NCT04329923	treatment	none	600	2	14	HCQ		16800	13020
Treating COVID-19 With Hydroxychloroquine (TEACH)	COVID-19	Drug: Hydroxychloroquine (HCQ)|Other: Pacebo: Calcium citrate	https://ClinicalTrials.gov/show/NCT04369742	treatment	400	200	2	5	HCQ		2400	1860
Hydroxychloroquine for COVID-19	COVID-19, Hydroxychloroquine Sulfate	Drug: Hydroxychloroquine Sulfate|Drug: Placebo	https://ClinicalTrials.gov/show/NCT04342221	treatment	800	600	1	7	HCQ		4400	3410
Efficacy and Tolerability of Hydroxychloroquine in Adult Patients With COVID-19	Coronavirus Infection	Drug: Hydroxychloroquine Sulfate 200 MG [Plaquenil]	https://ClinicalTrials.gov/show/NCT04384380	treatment	400	200	2	7	HCQ		3200	2480
Open Label Study to Compare Efficacy, Safety and Tolerability of Hydroxychloroquine Combined With Azithromycin Compared to Hydroxychloroquine Combined With Camostat Mesylate and to "no Treatment" in SARS CoV 2 Virus	COVID - 19	Drug: hydroxychloroquine in combination with camostat mesylate|Drug: Hydroxychloroquine in combination of Azithromycin	https://ClinicalTrials.gov/show/NCT04355052	treatment	400	200	2	5	HCQ		2400	1860
ALBERTA HOPE COVID-19 for the Prevention of Severe COVID19 Disease	COVID-19	Drug: Hydroxychloroquine	https://ClinicalTrials.gov/show/NCT04329611	treatment	400	200	2	5	HCQ		2400	1860
Safety and Efficacy of Hydroxychloroquine Associated With Azithromycin in SARS-CoV2 Virus (Coalition Covid-19 Brasil II)	Coronavirus Infections|Pneumonia, Viral	Drug: Hydroxychloroquine + azithromycin|Drug: Hydroxychloroquine	https://ClinicalTrials.gov/show/NCT04321278	treatment	none	400	2	10	HCQ		8000	6200
Clinical Trial to Evaluate Efficacy of 3 Types of Treatment in Patients With Pneumonia by COVID-19	COVID-19 Pneumonia	Drug: Hidroxicloroquine|Drug: Lopinavir/ritonavir|Drug: Imatinib tablets|Drug: Baricitinib Oral Tablet	https://ClinicalTrials.gov/show/NCT04346147	treatment	none	200	2	7	HCQ		2800	2170
Pragmatic Factorial Trial of Hydroxychloroquine, Azithromycin, or Both for Treatment of Severe SARS-CoV-2 Infection	SARS-CoV-2	Other: Standard of care|Drug: Hydroxychloroquine|Drug: Azithromycin	https://ClinicalTrials.gov/show/NCT04335552	treatment	800	600	1	5	HCQ		3200	2480
Treatment in Patients With Suspected or Confirmed COVID-19 With Early Moderate or Severe Disease	COVID-19	Drug: Hydroxychloroquine|Drug: Azithromycin	https://ClinicalTrials.gov/show/NCT04344444	treatment	400	200	2	5	HCQ		2400	1860
Multi-site Adaptive Trials Using Hydroxycholoroquine for COVID-19	COVID-19	Drug: HCQ + Intravenous Famotidine|Drug: HCQ + Placebo	https://ClinicalTrials.gov/show/NCT04370262	treatment	400	200	2	5	HCQ		2400	1860
The Phase 2 Study to Evaluate the Safety and Efficacy of Clevudine in Patients With Moderate COVID-19	COVID-19	Drug: Clevudine|Drug: Hydroxychloroquine	https://ClinicalTrials.gov/show/NCT04347915	treatment	none	200	2	21	HCQ		8400	6510
Hydroxychloroquine vs Nitazoxanide in Patients With COVID-19	Coronavirus Infection	Drug: Nitazoxanide 500 MG|Drug: Hydroxychloroquine	https://ClinicalTrials.gov/show/NCT04341493	treatment	400	200	2	6	HCQ		2800	2170
Hydroxychloroquine for the Treatment of Mild COVID-19 Disease	COVID-19	Drug: Hydroxychloroquine|Drug: Placebo	https://ClinicalTrials.gov/show/NCT04340544	treatment	none	600	1	7	HCQ		4200	3255
Double Therapy With IFN-beta 1b and Hydroxychloroquine	COVID	Drug: Interferon Beta-1B|Drug: Hydroxychloroquine	https://ClinicalTrials.gov/show/NCT04350281	treatment	800	400	1	3	HCQ		1600	1240
Hydroxychloroquine and Lopinavir/ Ritonavir to Improve the Health of People With COVID-19: "The Hope Coalition - 1"	COVID-19|Coronavirus Infection|Virus Disease|Acute Respiratory Infection|SARS-CoV Infection	Drug: Hydroxychloroquine Sulfate Tablets|Drug: Lopinavir/ Ritonavir Oral Tablet|Drug: Hydroxychloroquine Sulfate Tablets plus Lopinavir/ Ritonavir Oral Tablets|Drug: Placebo	https://ClinicalTrials.gov/show/NCT04403100	treatment	800	400	1	10	HCQ		4400	3410
Test and Treat COVID 65plus+	SARS-CoV 2|COVID-19	Drug: Hydroxychloroquine|Other: Placebo	https://ClinicalTrials.gov/show/NCT04351516	treatment	600	400	1	7	HCQ		3000	2325
Hydroxychloroquine vs. Azithromycin for Hospitalized Patients With Suspected or Confirmed COVID-19	COVID-19	Drug: Hydroxychloroquine|Drug: Azithromycin	https://ClinicalTrials.gov/show/NCT04329832	treatment	400	200	2	5	HCQ	yes	2400	1860
Azithromycin Added to Hydrochloroquine in Patients Admitted to Intensive Care With COVID-19: Randomised Controlled Trial	COVID-19|Respiratory Failure	Drug: Azithromycin|Drug: Hydroxychloroquine|Drug: Placebo	https://ClinicalTrials.gov/show/NCT04339816	treatment	400	200	2	5	HCQ		2400	1860
Efficacy and Safety of Novel Treatment Options for Adults With COVID-19 Pneumonia	COVID|Corona Virus Infection|Viral Pneumonia	Biological: Convalescent anti-SARS-CoV-2 plasma|Drug: Sarilumab|Drug: Baricitinib|Drug: Hydroxychloroquine|Other: Injective placebo|Other: Oral placebo	https://ClinicalTrials.gov/show/NCT04345289	treatment	none	600	1	7	HCQ		4200	3255
Treatment for COVID-19 in High-Risk Adult Outpatients	COVID-19|SARS-CoV-2	Drug: Ascorbic Acid|Drug: Hydroxychloroquine Sulfate|Drug: Azithromycin|Drug: Folic Acid	https://ClinicalTrials.gov/show/NCT04354428	treatment	400	200	2	10	HCQ		4400	3410
University of Utah COVID-19 Hydrochloroquine Trial	Coronavirus Infection|Coronavirus|Infectious Disease	Drug: Hydroxychloroquine|Drug: Placebo oral tablet	https://ClinicalTrials.gov/show/NCT04342169	treatment	400	200	2	5	HCQ		2400	1860
PRophylaxis of Exposed COVID-19 Individuals With Mild Symptoms Using choloroquinE Compounds	Sars-CoV2|Symptomatic Condition|Covid-19	Drug: Hydroxychloroquine Sulfate Regular dose|Drug: Hydroxychloroquine Sulfate Loading Dose|Drug: Chloroquine|Drug: Placebo	https://ClinicalTrials.gov/show/NCT04351191	treatment	400	200	2	5	HCQ		2400	1860
High-dose Hydroxychloroquine for the Treatment of Ambulatory Patients With Mild COVID-19	COVID-19	Drug: Hydroxychloroquine	https://ClinicalTrials.gov/show/NCT04351620	treatment	none	600	2	10	HCQ		12000	9300
Hydroxychloroquine Efficacy and Safety in Preventing SARS-CoV-2 Infection and COVID-19 Disease Severity During Pregnancy	Pregnancy Related|COVID|Covid-19	Drug: Hydroxychloroquine|Drug: Placebo	https://ClinicalTrials.gov/show/NCT04410562	treatment	400 x3 days	200	1	14	HCQ		3400	2635
Austrian CoronaVirus Adaptive Clinical Trial (COVID-19)	COVID-19	Drug: Chloroquine or Hydroxychloroquine|Drug: Lopinavir/Ritonavir|Other: Best standard of care|Drug: Rivaroxaban|Drug: Thromboprophylaxis|Drug: Candesartan|Drug: non-RAS blocking antihypertensives|Drug: Clazakizumab|Drug: placebo for clazakizumab	https://ClinicalTrials.gov/show/NCT04351724	treatment	400	200	2		HCQ
COVID MED Trial - Comparison Of Therapeutics for Hospitalized Patients Infected With SARS-CoV-2	SARS-CoV-2 Infection	Drug: lopinavir/ritonavir|Drug: Hydroxychloroquine Sulfate|Drug: Losartan|Drug: Placebos	https://ClinicalTrials.gov/show/NCT04328012	treatment	400	200	2	5	HCQ		2400	1860
Hydroxychloroquine Versus Placebo in COVID-19 Patients at Risk for Severe Disease	Coronavirus	Drug: Hydroxychloroquine|Drug: Placebo	https://ClinicalTrials.gov/show/NCT04325893	treatment	400	200	2	9	HCQ		4000	3100
Randomised Evaluation of COVID-19 Therapy	Severe Acute Respiratory Syndrome	Drug: Lopinavir-Ritonavir|Drug: Corticosteroid|Drug: Hydroxychloroquine|Drug: Azithromycin|Biological: Convalescent plasma|Drug: Tocilizumab	https://ClinicalTrials.gov/show/NCT04381936	treatment	800&800&400	400	2	10	HCQ		9600	7440
Evaluation of Efficacy of Levamisole and Formoterol+Budesonide in Treatment of COVID-19	COVID-19	Drug: Levamisole Pill + Budesonide+Formoterol inhaler|Drug: Lopinavir/Ritonavir + hydoxychloroquine	https://ClinicalTrials.gov/show/NCT04331470	treatment	none	200	2	7	HCQ		2800	2170
Randomized, Embedded, Multifactorial Adaptive Platform Trial for Community- Acquired Pneumonia	Community-acquired Pneumonia, Influenza, COVID-19	Drug: Fixed-duration Hydrocortisone|Drug: Shock-dependent hydrocortisone|Drug: Ceftriaxone|Drug: Moxifloxacin or Levofloxacin|Drug: Piperacillin-tazobactam|Drug: Ceftaroline|Drug: Amoxicillin-clavulanate|Drug: Macrolide administered for 3-5 days|Drug: Macrolide administered for up to 14 days|Drug: Five-days oseltamivir|Drug: Ten-days oseltamivir|Drug: Lopinavir/ritonavir|Drug: Hydroxychloroquine|…	https://ClinicalTrials.gov/show/NCT02735707	treatment	800	400	2	7	HCQ		6400	4960
Low Dose Anti-inflammatory Radiotherapy for the Treatment of Pneumonia by COVID-19	Pneumonia, Viral	Radiation: Low-dose radiotherapy|Drug: Hydroxychloroquine Sulfate|Drug: Ritonavir/lopinavir|Drug: Tocilizumab Injection [Actemra]|Drug: Azithromycin|Drug: Corticosteroid|Drug: Low molecular weight heparin|Device: Oxygen supply	https://ClinicalTrials.gov/show/NCT04380818	treatment	none	200	2	5	HCQ		2000	1550
Trial of Treatments for COVID-19 in Hospitalized Adults	Corona Virus Infection	Drug: Remdesivir|Drug: Lopinavir/ritonavir|Drug: Interferon Beta-1A|Drug: Hydroxychloroquine|Other: Standard of care	https://ClinicalTrials.gov/show/NCT04315948	treatment	800	400	1	10	HCQ		4400	3410
Novel Agents for Treatment of High-risk COVID-19 Positive Patients	COVID|Sars-CoV2	Drug: Hydroxychloroquine|Drug: Hydroxychloroquine and Azithromycin|Drug: Hydroxychloroquine and Ivermectin|Drug: Camostat Mesilate	https://ClinicalTrials.gov/show/NCT04374019	treatment	none	600	1	14	HCQ		8400	6510
Plasma Exchange in Patients With COVID-19 Disease and Invasive Mechanical Ventilation: a Randomized Controlled Trial	Coronavirus	Biological: Plasma exchange|Drug: Standar medical treatmen	https://ClinicalTrials.gov/show/NCT04374539	treatment	400	200	2	5	HCQ		2400	1860
Randomized Comparison of Combination Azithromycin and Hydroxychloroquine vs. Hydroxychloroquine Alone for the Treatment of Confirmed COVID-19	SARS-CoV-2|COVID-19	Combination Product: Hydroxychloroquine Sulfate + Azithromycin|Drug: Hydroxychloroquine Sulfate	https://ClinicalTrials.gov/show/NCT04336332	treatment	none	200	3	10	HCQ		6000	4650
Efficacy and Safety of Hydroxychloroquine and Favipiravir in the Treatment of Mild to Moderate COVID-19	Sars-CoV2|COVID-19	Drug: Favipiravir (3200 mg + 1200 mg)|Drug: Favipiravir (3600 mg + 1600 mg)|Drug: Favipiravir (3200 mg + 1200 mg) combined with Hydroxychloroquine|Drug: Favipiravir (3200 mg + 1200 mg) combined with Azithromycin|Drug: Hydroxychloroquine|Drug: Hydroxychloroquine combined with Azithromycin	https://ClinicalTrials.gov/show/NCT04411433	treatment	400	200	2	5	HCQ		2400	1860
The Vietnam Chloroquine Treatment on COVID-19	SARS-CoV-2 Infection|COVID-19	Drug: Chloroquine phosphate	https://ClinicalTrials.gov/show/NCT04328493	treatment	1500	500	1	10	CQ	yes	6000	3720
Chloroquine, Hydroxychloroquine or Only Supportive Care in Patients AdmItted With Moderate to Severe COVID-19	COVID-19	Drug: Chloroquine Sulfate|Drug: Hydroxychloroquine|Other: Standard supportive care	https://ClinicalTrials.gov/show/NCT04362332	treatment	1000&500	500	2	5	CQ		5500	3410
Anti-Coronavirus Therapies to Prevent Progression of Coronavirus Disease 2019 (COVID-19) Trial	Coronavirus|Severe Acute Respiratory Syndrome	Drug: Azithromycin|Drug: Hydoxychloroquine or Chloroquine|Drug: Interferon-Beta	https://ClinicalTrials.gov/show/NCT04324463	treatment	1000	500	2	7	CQ		8000	4960
Chloroquine Diphosphate for the Treatment of Severe Acute Respiratory Syndrome Secondary to SARS-CoV2	SARS-CoV Infection|Severe Acute Respiratory Syndrome (SARS) Pneumonia	Drug: Chloroquine diphosphate	https://ClinicalTrials.gov/show/NCT04323527	treatment	none	1000	2	10	CQ		20000	12400
Chloroquine Phosphate Against Infection by the Novel Coronavirus SARS-CoV-2 (COVID-19): The HOPE Open-Label, Non Randomized Clinical Trial	Pneumonia, Viral|Covid-19	Drug: UNIKINON (Chloroquine phosphate) 200mg tablets	https://ClinicalTrials.gov/show/NCT04344951	treatment	none	500	2	7	CQ		7000	4340
Post-Exposure Prophylaxis for Asymptomatic SARS-CoV-2 COVID-19 Patients With choloroquinE Compounds	SARS-CoV-2|Coronavirus Infection|Asymptomatic Condition|COVID-19	Drug: Hydroxychloroquine Sulfate Regular dose|Drug: Hydroxychloroquine Sulfate Loading Dose|Drug: Chloroquine|Drug: Placebo	https://ClinicalTrials.gov/show/NCT04346667	treatment	none	500	2	5	CQ		5000	3100
Chloroquine Diphosphate in the Prevention of SARS in Covid-19 Infection	COVID-19|SARS-CoV Infection|Severe Acute Respiratory Syndrome (SARS) Pneumonia|Clinical Trial	Drug: Chloroquine Diphosphate|Drug: Placebo oral tablet	https://ClinicalTrials.gov/show/NCT04342650	treatment	1400	750	1	5	CQ		4400	2728
Prospective Study in Patients With Advanced or Metastatic Cancer and SARS-CoV-2 Infection	SARS-CoV-2 (COVID-19) Infection|Advanced or Metastatic Hematological or Solid Tumor	Drug: Chloroquine analog (GNS651)|Drug: Nivolumab|Drug: Tocilizumab|Other: Standard of care|Drug: Avdoralimab|Drug: Monalizumab	https://ClinicalTrials.gov/show/NCT04333914	treatment	400	200	1	14	Chloroquine analog (GNS651)		3000	1860
